# Supplementary material for: The treatment of dispersion terms for solution systems
Source: Royal Society of Chemistry journal article supplement (doi:10.1039/d3cp02733c), 2023-01-01
Supplement: d3cp02733c1.pdf [file d3cp02733c1.pdf]

## The treatment of dispersion terms for solution systems

De-Cai Fang,\* Si-Cong Liu, Dan-Yang Liu, and Xin-Rui Zhu

College of Chemistry, Beijing Normal University, Beijing 100875, China

Email: [dcfang@bnu.edu.cn](mailto:dcfang@bnu.edu.cn)

|                  |                                                                                                             |              |
|------------------|-------------------------------------------------------------------------------------------------------------|--------------|
| <b>Scheme S1</b> | The numbering system for the ligand exchange reactions                                                      | ..... s2     |
| <b>Table S1</b>  | The calculated total electronic energies, enthalpies, entropies and free energies in a.u.                   | ..... s2     |
| <b>Scheme S2</b> | The studied catalytic reaction schemes and numbering systems                                                | ..... s3-s5  |
| <b>Table S3</b>  | The calculated solvation energies(kcal mol <sup>-1</sup> ), along with the experimental solvation energies. | ..... s5-s10 |

**Scheme S1** The numbering system for the ligand exchange reactions

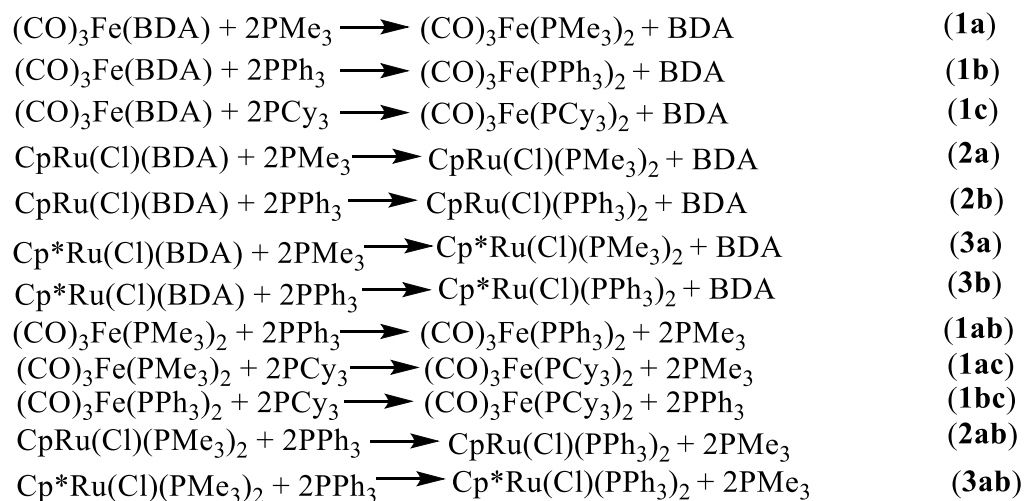

**Table S1** The calculated total electronic energies, enthalpies, entropies and free energies in a.u.

| Species                                              | $E_{\text{elec/a.u.}}^{\text{a}}$ | $H/\text{a.u.}^{\text{a}}$ | $E_{\text{elec/a.u.}}^{\text{b}}$ | $E_{\text{elec/a.u.}}^{\text{c}}$ |
|------------------------------------------------------|-----------------------------------|----------------------------|-----------------------------------|-----------------------------------|
| (CO) <sub>3</sub> Fe(BDA)                            | -2064.54367                       | -2064.32643                | -2064.60774                       | -2064.58814                       |
| CpRu(Cl)(BDA)                                        | -5366.92589                       | -5366.64224                | -5367.01017                       | -5366.98021                       |
| Cp*Ru(Cl)(BDA)                                       | -5563.57757                       | -5563.14729                | -5563.70234                       | -5563.65325                       |
| (CO) <sub>3</sub> Fe(PMe <sub>3</sub> ) <sub>2</sub> | -2524.27815                       | -2523.99943                | -2524.36337                       | -2524.33181                       |
| (CO) <sub>3</sub> Fe(PPh <sub>3</sub> ) <sub>2</sub> | -3675.00903                       | -3674.38992                | -3675.25202                       | -3675.15593                       |
| (CO) <sub>3</sub> Fe(PCy <sub>3</sub> ) <sub>2</sub> | -3696.75957                       | -3695.71415                | -3697.05928                       | -3696.93635                       |
| CpRu(Cl)(PMe <sub>3</sub> ) <sub>2</sub>             | -5976.98282                       | -5976.64453                | -5977.08453                       | -5977.04579                       |
| CpRu(Cl)(PPh <sub>3</sub> ) <sub>2</sub>             | -7324.34510                       | -7323.51875                | -7324.66570                       | -7324.53119                       |
| Cp*Ru(Cl)(PMe <sub>3</sub> ) <sub>2</sub>            | -6173.62630                       | -6173.14109                | -6173.76960                       | -6173.71135                       |
| Cp*Ru(Cl)(PPh <sub>3</sub> ) <sub>2</sub>            | -7324.34510                       | -7323.51875                | -7324.66570                       | -7324.53119                       |
| PMe <sub>3</sub>                                     | -461.07269                        | -460.95273                 | -461.09033                        | -461.08702                        |
| PPh <sub>3</sub>                                     | -1036.44972                       | -1036.15946                | -1036.53456                       | -1036.50709                       |
| Pcy <sub>3</sub>                                     | -1047.32360                       | -1046.82093                | -1047.43388                       | -1047.39503                       |
| BDA                                                  | -462.45949                        | -462.27770                 | -462.50610                        | -462.48806                        |

(a) B3LYP+IDSCRF/TZP-DKH(-dfg) optimization and frequency calculations;

(b) B3LYP-D3-D3+IDSCRF/TZP-DKH(-dfg) single-point energy calculations;

(c) B3LYP-D3a+IDSCRF/TZP-DKH(-dfg) single-point energy calculations

**Scheme S2** The studied catalytic reaction schemes and numbering systems

**M1:**

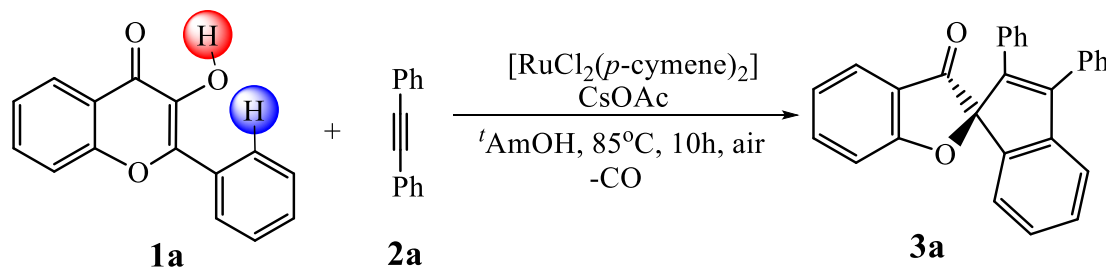

**M2:**

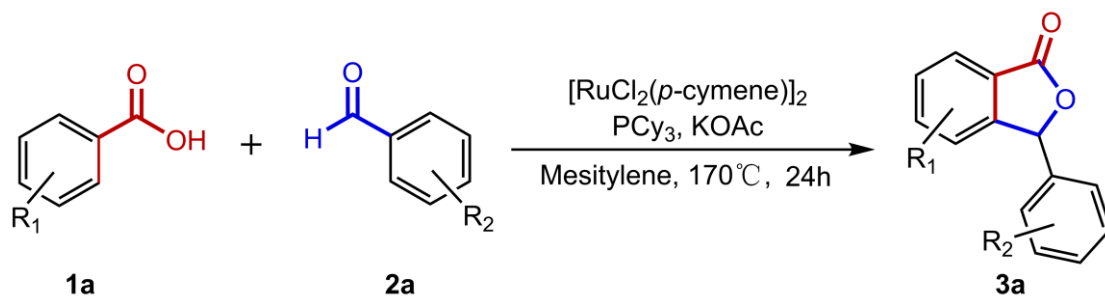

**M3:**

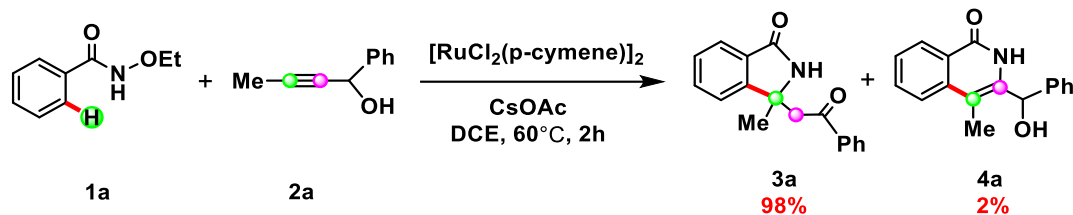

**M4:**

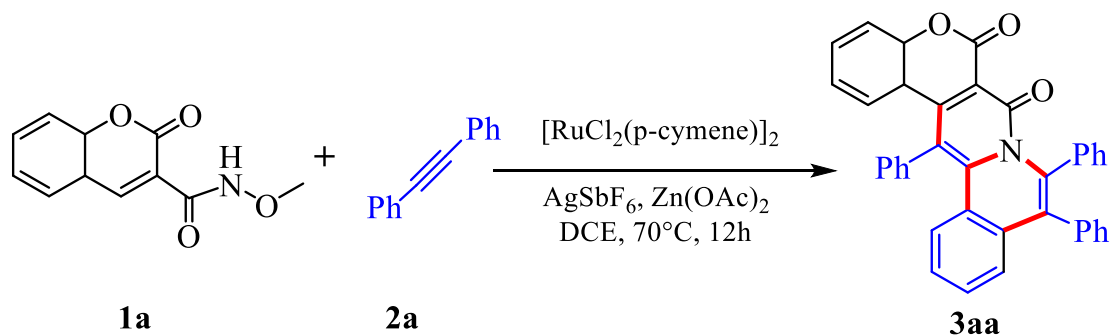

**M5:**

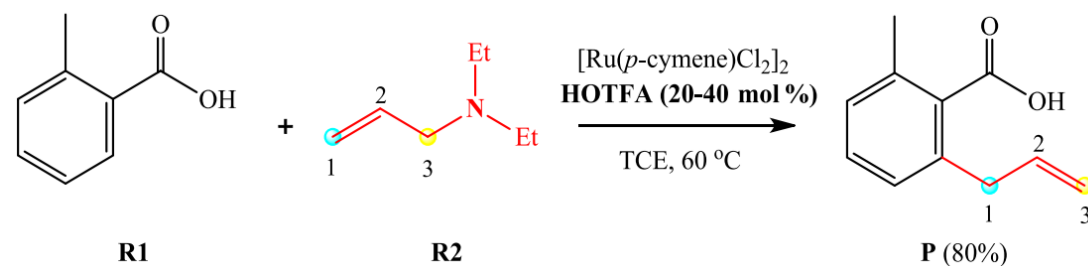

**M6:**

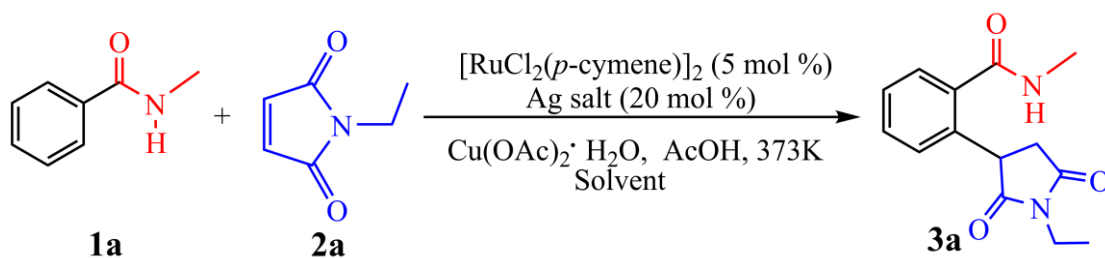

**M7:**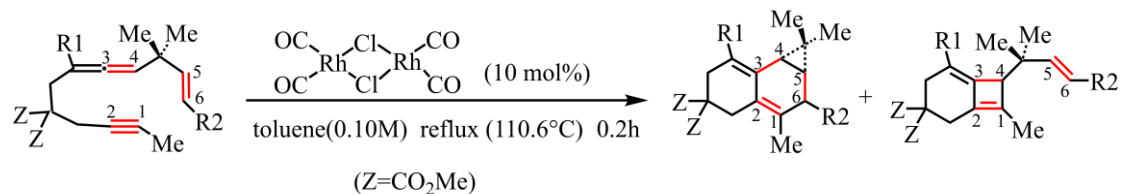**1a** (R1=PhO<sub>2</sub>S, R2=H)**2a** (R1=PhO<sub>2</sub>S, R2=H)(100%)    **3a** (R1=PhO<sub>2</sub>S, R2=H)(0%)**1b** (R1=PhO<sub>2</sub>S, R2=npr(E))**2b** (R1=PhO<sub>2</sub>S, R2=npr(E)) (67%)    **3b** (R1=PhO<sub>2</sub>S, R2=npr(E)) (23%)**1c** (R1=PhO<sub>2</sub>S, R2=npr(Z))**2c** (R1=PhO<sub>2</sub>S, R2=npr(Z))(100%)    **3c** (R1=PhO<sub>2</sub>S, R2=npr(Z))(0%)**M8:**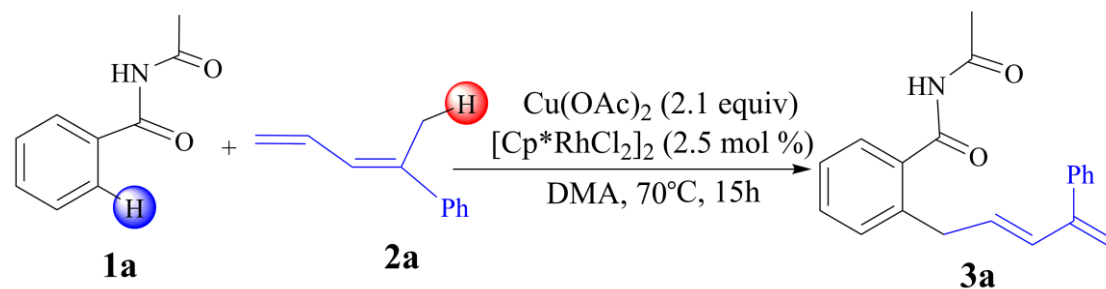**M9:**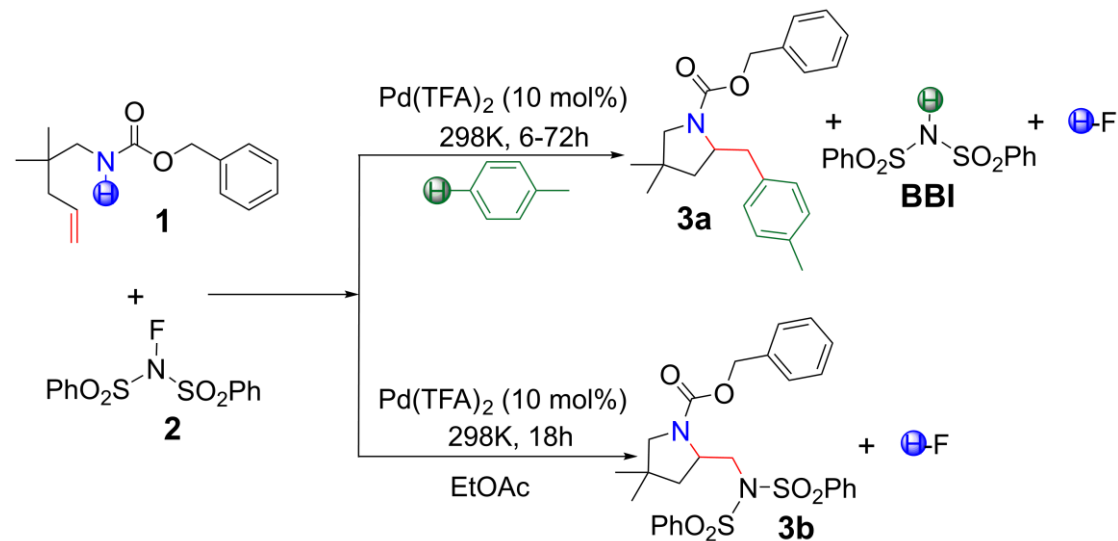**M10:**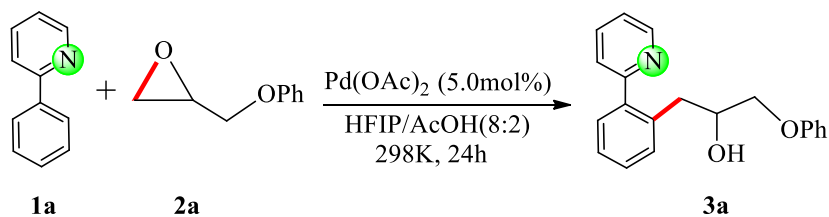

M11:

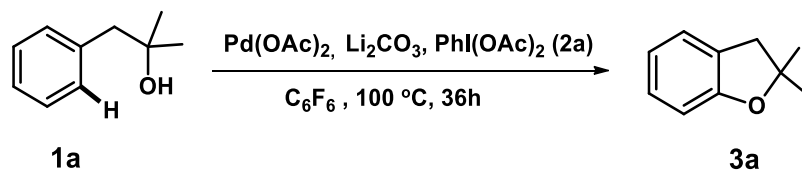

**Table S2** The calculated total electronic energies, enthalpies, entropies and free energies in a.u.

| Species    | $E_{\text{elec}}/\text{a.u.}$ | $H/\text{a.u.}$ | $S_g$ | $S_l$ | $G_g/\text{a.u.}$ | $G_l/\text{a.u.}$ |
|------------|-------------------------------|-----------------|-------|-------|-------------------|-------------------|
| <b>1</b>   | -1619.08973 <sup>a</sup>      | -1618.46993     | 176.6 | 156.0 | -1618.55382       | -1618.54403       |
|            | -1619.06945 <sup>b</sup>      | -1618.44961     | 180.0 | 159.4 | -1618.53512       | -1618.52533       |
| <b>1a</b>  | -678.83562                    | -678.69346      | 115.8 | 93.7  | -678.74845        | -678.73798        |
|            | -678.82606                    | -678.68391      | 116.0 | 94.0  | -678.73902        | -678.72855        |
| <b>c1a</b> | -2297.93892                   | -2297.17405     | 255.2 | 234.6 | -2297.29529       | -2297.28552       |
|            | -2297.91631                   | -2297.15139     | 257.1 | 236.5 | -2297.27355       | -2297.26377       |
| <b>1b</b>  | -416.89341                    | -416.78711      | 85.0  | 62.4  | -416.82751        | -416.81676        |
|            | -416.88637                    | -416.78009      | 85.4  | 62.7  | -416.82065        | -416.80990        |
| <b>c1b</b> | -2035.99104                   | -2035.26242     | 229.0 | 208.4 | -2035.37122       | -2035.36143       |
|            | -2035.96922                   | -2035.24050     | 230.5 | 209.8 | -2035.35000       | -2035.34020       |
| <b>2</b>   | -2639.05148                   | -2638.21988     | 287.7 | 267.1 | -2638.35659       | -2638.34681       |
|            | -2639.02817                   | -2638.19641     | 284.6 | 264.0 | -2638.33165       | -2638.32187       |
| <b>2a</b>  | -1189.36857                   | -1189.17465     | 138.5 | 116.0 | -1189.24046       | -1189.22975       |
|            | -1189.35412                   | -1189.16020     | 139.1 | 116.6 | -1189.22631       | -1189.21560       |
| <b>c2a</b> | -3828.42767                   | -3827.40012     | 377.0 | 356.5 | -3827.57926       | -3827.56950       |
|            | -3828.39892                   | -3827.37126     | 379.8 | 359.2 | -3827.55172       | -3827.54195       |
| <b>2b</b>  | -1079.83974                   | -1079.74415     | 100.0 | 77.1  | -1079.79165       | -1079.78077       |
|            | -1079.83003                   | -1079.73446     | 99.9  | 77.0  | -1079.78192       | -1079.77104       |
| <b>c2b</b> | -3718.89891                   | -3717.96995     | 341.4 | 320.9 | -3718.13218       | -3718.12244       |
|            | -3718.87197                   | -3717.94299     | 344.0 | 323.5 | -3718.10643       | -3718.09669       |
| <b>3</b>   | -2304.16371                   | -2303.44971     | 218.6 | 198.4 | -2303.55183       | -2303.54241       |
|            | -2304.12955                   | -2303.41542     | 220.8 | 200.7 | -2303.51858       | -2303.50916       |
| <b>3a</b>  | -2286.95843                   | -2286.56091     | 132.5 | 110.9 | -2286.62281       | -2286.61273       |
|            | -2286.93287                   | -2286.53563     | 132.6 | 111.0 | -2286.59757       | -2286.58749       |
| <b>c3a</b> | -4591.12687                   | -4590.01342     | 304.2 | 284.3 | -4590.15555       | -4590.14623       |
|            | -4591.08186                   | -4589.96847     | 313.2 | 293.3 | -4590.11481       | -4590.10549       |
| <b>3b</b>  | -2668.21737                   | -2667.75255     | 145.3 | 123.9 | -2667.82041       | -2667.81043       |
|            | -2668.18878                   | -2667.72370     | 143.9 | 122.5 | -2667.79092       | -2667.78094       |
| <b>c3b</b> | -4972.38590                   | -4971.20456     | 319.0 | 299.2 | -4971.35360       | -4971.34432       |
|            | -4972.33881                   | -4971.15840     | 315.2 | 295.3 | -4971.30563       | -4971.29634       |
| <b>4</b>   | -2878.18972                   | -2877.03754     | 339.3 | 319.6 | -2877.19874       | -2877.18939       |
|            | -2878.15446                   | -2877.00175     | 339.5 | 319.8 | -2877.16305       | -2877.15370       |

|            |             |             |        |       |             |             |
|------------|-------------|-------------|--------|-------|-------------|-------------|
| <b>4a</b>  | -416.18593  | -416.06868  | 83.0   | 59.5  | -416.10812  | -416.09698  |
|            | -416.17450  | -416.05707  | 83.3   | 59.8  | -416.09664  | -416.08550  |
| <b>c4a</b> | -3294.39810 | -3293.12507 | 372.1  | 352.2 | -3293.30184 | -3293.29243 |
|            | -3294.36242 | -3293.08891 | 373.7  | 353.9 | -3293.26649 | -3293.25707 |
| <b>4b</b>  | -381.60431  | -381.51230  | 77.0   | 53.6  | -381.54888  | -381.53777  |
|            | -381.59592  | -381.50382  | 76.6   | 53.3  | -381.54024  | -381.52913  |
| <b>c4b</b> | -3259.80588 | -3258.55848 | 372.5  | 352.8 | -3258.73549 | -3258.72610 |
|            | -3259.77070 | -3258.52279 | 377.2  | 357.4 | -3258.70201 | -3258.69261 |
| <b>5</b>   | -4213.91033 | -4212.87936 | 317.0  | 296.6 | -4213.02998 | -4213.02027 |
|            | -4213.86808 | -4212.83689 | 320.5  | 300.1 | -4212.98918 | -4212.97948 |
| <b>5a</b>  | -2075.40531 | -2074.92489 | 143.01 | 121.6 | -2074.99283 | -2074.98265 |
|            | -2075.38981 | -2074.90928 | 45.7   | 124.3 | -2074.97852 | -2074.96835 |
| <b>c5a</b> | -6289.34160 | -6287.82565 | 415.3  | 394.9 | -6288.02297 | -6288.01325 |
|            | -6289.29996 | -6287.78372 | 414.9  | 394.5 | -6287.98088 | -6287.97116 |

a) eqn. 12; b) eqn. 13

**Table S3** The calculated solvation energies(kcal mol<sup>-1</sup>), along with the experimental solvation energies.

| quantity                       | solvent     | $E_{SSD}$<br>SMSSP | $\Delta E^{sol}$<br>PCM | $\Delta E^{sol}$<br>IDSCRF | $\Delta G_S^*$ |
|--------------------------------|-------------|--------------------|-------------------------|----------------------------|----------------|
| C <sub>3</sub> H <sub>8</sub>  | cyclohexane | -2.80              | -4.10                   | -2.65                      | -2.1           |
| C <sub>4</sub> H <sub>10</sub> | cyclohexane | -3.65              | -4.91                   | -3.69                      | -2.86          |
| C <sub>5</sub> H <sub>12</sub> | cyclohexane | -4.51              | -5.68                   | -4.25                      | -3.50          |
| C <sub>8</sub> H <sub>18</sub> | cyclohexane | -7.13              | -8.04                   | -6.04                      | -5.63          |
| cyclohexane                    | cyclohexane | -4.90              | -5.86                   | -4.44                      | -4.43          |
| benzene                        | cyclohexane | -4.69              | -5.18                   | -4.09                      | -4.19          |
| toluene                        | cyclohexane | -5.64              | -5.95                   | -4.53                      | -4.90          |
| ethylbenzene                   | cyclohexane | -6.53              | -6.64                   | -5.04                      | -4.97          |
| o-xylene                       | cyclohexane | -6.53              | -6.64                   | -5.07                      | -5.54          |
| m-xylene                       | cyclohexane | -6.60              | -6.57                   | -5.08                      | -5.52          |
| naphthalene                    | cyclohexane | -8.19              | -7.23                   | -5.67                      | -7.17          |
| methanol                       | cyclohexane | -1.29              | -2.36                   | -1.97                      | -1.38          |
| ethanol                        | cyclohexane | -2.25              | -3.76                   | -2.74                      | -2.42          |
| 1-propanol                     | cyclohexane | -3.09              | -4.58                   | -3.40                      | -2.73          |
| isopropanol                    | cyclohexane | -3.11              | -4.51                   | -3.23                      | -2.37          |
| 1-butanol                      | cyclohexane | -3.95              | -5.40                   | -4.02                      | -3.52          |
| t-butanol                      | cyclohexane | -3.94              | -5.19                   | -3.52                      | -2.93          |
| 1-pentanol                     | cyclohexane | -4.81              | -6.16                   | -4.63                      | -3.61          |
| phenol                         | cyclohexane | -5.07              | -5.63                   | -4.62                      | -5.57          |
| 1-hexanol                      | cyclohexane | -5.68              | -6.99                   | -5.27                      | -5.31          |
| o-cresol                       | cyclohexane | -5.99              | -6.38                   | -4.91                      | -6.02          |
| m-cresol                       | cyclohexane | -6.02              | -6.41                   | -4.95                      | -5.20          |
| p-cresol                       | cyclohexane | -6.02              | -6.43                   | -4.95                      | -5.89          |
| 1-heptanol                     | cyclohexane | -6.56              | -7.73                   | -5.89                      | -6.02          |
| 1,4-dioxane                    | cyclohexane | -3.88              | -5.37                   | -4.03                      | -4.17          |
| diethylether                   | cyclohexane | -3.95              | -5.45                   | -3.61                      | -3.03          |
| anisol                         | cyclohexane | -6.02              | -6.45                   | -4.96                      | -5.38          |
| benzaldehyde                   | cyclohexane | -5.87              | -7.13                   | -5.14                      | -5.71          |
| acetone                        | cyclohexane | -2.86              | -4.21                   | -2.78                      | -2.67          |
| 2-butanone                     | cyclohexane | -3.68              | -5.28                   | -3.74                      | -3.48          |

|                          |             |        |        |       |       |
|--------------------------|-------------|--------|--------|-------|-------|
| 2-pentanone              | cyclohexane | -4.54  | -5.81  | -4.00 | -4.19 |
| 3-pentanone              | cyclohexane | -4.50  | -5.79  | -3.99 | -4.30 |
| 2-hexanone               | cyclohexane | -5.41  | -6.57  | -4.62 | -4.77 |
| 3,3-dimethylbutanone     | cyclohexane | -5.32  | -6.46  | -4.30 | -4.42 |
| 2-heptanone              | cyclohexane | -6.28  | -7.38  | -5.23 | -5.47 |
| acetophenone             | cyclohexane | -6.69  | -6.83  | -5.08 | -6.29 |
| aceticacid               | cyclohexane | -2.28  | -3.89  | -2.99 | -1.73 |
| propanoicacid            | cyclohexane | -3.10  | -4.69  | -3.65 | -3.78 |
| methylacetate            | cyclohexane | -3.12  | -4.75  | -3.08 | -3.06 |
| methylpropanoate         | cyclohexane | -3.95  | -5.53  | -3.71 | -3.71 |
| ethylacetate             | cyclohexane | -3.99  | -5.04  | -3.72 | -3.56 |
| propylacetate            | cyclohexane | -4.85  | -6.34  | -4.35 | -4.36 |
| methylpentanoate         | cyclohexane | -5.70  | -7.11  | -4.95 | -5.04 |
| butylacetate             | cyclohexane | -5.73  | -7.11  | -4.97 | -4.94 |
| methylhexanoate          | cyclohexane | -6.57  | -7.89  | -5.56 | -5.75 |
| pentylacetate            | cyclohexane | -6.61  | -7.90  | -5.58 | -5.71 |
| ethylamine               | cyclohexane | -2.60  | -3.96  | -2.87 | -2.04 |
| trimethylamine           | cyclohexane | -3.51  | -4.73  | -2.92 | -2.63 |
| diethylamine             | cyclohexane | -4.27  | -5.58  | -3.79 | -3.61 |
| pyridine                 | cyclohexane | -4.33  | -5.02  | -3.95 | -4.30 |
| aniline                  | cyclohexane | -5.52  | -5.83  | -5.03 | -5.52 |
| 2-methylpyridine         | cyclohexane | -5.29  | -5.83  | -4.24 | -5.05 |
| 3-methylpyridine         | cyclohexane | -5.27  | -5.80  | -4.24 | -5.14 |
| 4-methylpyridine         | cyclohexane | -5.27  | -5.80  | -4.25 | -5.23 |
| N-methylaniline          | cyclohexane | -6.49  | -6.61  | -4.91 | -6.33 |
| 2,6-dimethylpyridine     | cyclohexane | -6.26  | -6.59  | -4.48 | -5.51 |
| Acetonitrile             | cyclohexane | -1.95  | -3.19  | -2.16 | -1.87 |
| Benzonitrile             | cyclohexane | -5.89  | -5.90  | -4.68 | -5.54 |
| 1-nitropropane           | cyclohexane | -3.80  | -5.28  | -4.02 | -4.06 |
| Nitrobenzene             | cyclohexane | -5.92  | -6.35  | -5.16 | -6.62 |
| 2-methyl-1-nitrobenzene  | cyclohexane | -6.84  | -7.00  | -5.37 | -6.71 |
| 1-propanethiol           | cyclohexane | -4.27  | -5.56  | -4.01 | -3.12 |
| Thioanisole              | cyclohexane | -7.33  | -7.26  | -5.24 | -5.66 |
| m-hydroxybenzaldehyde    | cyclohexane | -6.26  | -6.51  | -5.27 | -6.88 |
| p-hydroxybenzaldehyde    | cyclohexane | -6.39  | -6.55  | -5.33 | -7.19 |
| Fluorobenzene            | cyclohexane | -4.69  | -5.46  | -4.35 | -3.59 |
| 1,1,1-trichloroethane    | cyclohexane | -4.78  | -6.08  | -4.20 | -4.08 |
| Trichloroethene          | cyclohexane | -4.79  | -6.01  | -4.34 | -4.29 |
| Chlorobenzene            | cyclohexane | -5.76  | -6.15  | -4.72 | -5.10 |
| 1,4-dichlorobenzene      | cyclohexane | -6.91  | -7.12  | -5.35 | -5.89 |
| bromobenzene             | cyclohexane | -6.26  | -6.50  | -4.92 | -5.29 |
| 2,2,2-trifluoroethanol   | cyclohexane | -2.28  | -4.66  | -3.86 | -1.53 |
| p-bromophenol            | cyclohexane | -6.65  | -6.97  | -5.43 | -7.14 |
| water                    | cyclohexane | -0.57  | -1.77  | -1.61 | -0.39 |
| trimethylphosphate       | cyclohexane | -5.02  | -7.01  | -5.46 | -5.67 |
| triethylphosphate        | cyclohexane | -7.64  | -8.89  | -6.80 | -7.60 |
| tripropylphosphate       | cyclohexane | -10.23 | -10.58 | -8.16 | -7.71 |
| methylbenzoate           | cyclohexane | -7.02  | -7.35  | -5.70 | -7.01 |
| tetrahydropyran          | cyclohexane | -4.39  | -5.63  | -4.25 | -4.41 |
| ethylphenylether         | cyclohexane | -6.96  | -7.24  | -5.32 | -6.00 |
| difluorodichloromethane  | cyclohexane | -3.02  | -5.08  | -3.82 | -1.18 |
| fluorotrichloromethane   | cyclohexane | -3.96  | -5.71  | -4.17 | -2.63 |
| 3,5-dibromo-4-hydroxyben | cyclohexane | -9.58  | -8.72  | -6.71 | -6.83 |

|                       |                  |       |       |       |       |
|-----------------------|------------------|-------|-------|-------|-------|
| zonitrile             |                  |       |       |       |       |
| nitromethane          | cyclohexane      | -2.13 | -3.67 | -2.71 | -2.86 |
| N,N-dimethylformamide | cyclohexane      | -3.53 | -4.87 | -3.30 | -3.83 |
| pyrrole               | cyclohexane      | -3.67 | -4.58 | -3.66 | -3.77 |
| quinoline             | cyclohexane      | -7.82 | -7.10 | -5.57 | -7.38 |
| benzamide             | cyclohexane      | -6.43 | -7.15 | -5.82 | -8.72 |
| 2-methylaniline       | cyclohexane      | -6.42 | -6.49 | -4.95 | -6.44 |
| 3-methylaniline       | cyclohexane      | -6.48 | -6.56 | -4.97 | -6.47 |
| 4-methylaniline       | cyclohexane      | -6.49 | -6.57 | -4.98 | -6.30 |
| iodobenzene           | cyclohexane      | -7.23 | -7.27 | -5.63 | -6.26 |
| n-octane              | CCl <sub>4</sub> | -7.61 | -6.58 | -5.15 | -5.39 |
| 2-methylpropene       | CCl <sub>4</sub> | -3.86 | -3.75 | -2.93 | -2.63 |
| 1-butene              | CCl <sub>4</sub> | -3.78 | -3.79 | -2.96 | -2.48 |
| E-2-pentene           | CCl <sub>4</sub> | -4.86 | -4.47 | -3.48 | -3.46 |
| benzene               | CCl <sub>4</sub> | -5.01 | -4.30 | -3.38 | -4.50 |
| toluene               | CCl <sub>4</sub> | -6.02 | -4.96 | -3.86 | -5.12 |
| ethylbenzene          | CCl <sub>4</sub> | -6.97 | -5.48 | -4.28 | -5.67 |
| o-xylene              | CCl <sub>4</sub> | -6.98 | -5.50 | -4.32 | -6.07 |
| m-xylene              | CCl <sub>4</sub> | -7.04 | -5.52 | -4.32 | -5.71 |
| naphthalene           | CCl <sub>4</sub> | -8.75 | -5.98 | -4.86 | -7.55 |
| methanol              | CCl <sub>4</sub> | -1.48 | -2.34 | -1.88 | -2.25 |
| ethanol               | CCl <sub>4</sub> | -2.40 | -3.08 | -2.44 | -2.96 |
| 1-propanol            | CCl <sub>4</sub> | -3.30 | -3.75 | -2.98 | -3.64 |
| isopropanol           | CCl <sub>4</sub> | -3.32 | -3.70 | -2.95 | -3.15 |
| 1-butanol             | CCl <sub>4</sub> | -4.22 | -4.40 | -3.49 | -4.20 |
| t-butanol             | CCl <sub>4</sub> | -4.21 | -4.33 | -3.43 | -3.40 |
| 1-pentanol            | CCl <sub>4</sub> | -5.14 | -5.06 | -4.00 | -4.73 |
| phenol                | CCl <sub>4</sub> | -5.41 | -4.64 | -3.92 | -6.14 |
| 1-hexanol             | CCl <sub>4</sub> | -6.07 | -5.67 | -4.50 | -5.04 |
| o-cresol              | CCl <sub>4</sub> | -6.40 | -5.27 | -4.18 | -6.51 |
| p-cresol              | CCl <sub>4</sub> | -6.43 | -5.47 | -4.52 | -6.32 |
| 1-heptanol            | CCl <sub>4</sub> | -7.00 | -5.70 | -4.50 | -6.49 |
| 1,4-dioxane           | CCl <sub>4</sub> | -4.15 | -4.43 | -3.56 | -4.97 |
| anisole               | CCl <sub>4</sub> | -6.43 | -5.31 | -4.22 | -5.49 |
| benzaldehyde          | CCl <sub>4</sub> | -6.27 | -5.03 | -4.22 | -6.11 |
| acetone               | CCl <sub>4</sub> | -3.06 | -3.46 | -2.79 | -3.35 |
| 2-butanone            | CCl <sub>4</sub> | -3.93 | -4.11 | -3.28 | -4.09 |
| cyclopentanone        | CCl <sub>4</sub> | -4.43 | -4.49 | -3.54 | -5.56 |
| 2-pentanone           | CCl <sub>4</sub> | -4.85 | -4.76 | -3.79 | -4.81 |
| 2-hexanone            | CCl <sub>4</sub> | -5.78 | -5.40 | -4.29 | -5.47 |
| 2-heptanone           | CCl <sub>4</sub> | -6.71 | -6.05 | -4.79 | -6.12 |
| acetophenone          | CCl <sub>4</sub> | -7.14 | -5.63 | -4.51 | -7.10 |
| aceticacid            | CCl <sub>4</sub> | -2.43 | -3.20 | -2.63 | -3.64 |
| propanoicacid         | CCl <sub>4</sub> | -3.31 | -3.86 | -3.14 | -4.09 |
| butanoicacid          | CCl <sub>4</sub> | -4.23 | -4.49 | -3.63 | -4.81 |
| hexanoicacid          | CCl <sub>4</sub> | -6.08 | -5.80 | -4.69 | -6.99 |
| methylacetate         | CCl <sub>4</sub> | -3.33 | -3.90 | -3.14 | -3.82 |
| methylpropanoate      | CCl <sub>4</sub> | -4.22 | -4.54 | -3.62 | -4.43 |
| ethylacetate          | CCl <sub>4</sub> | -4.26 | -4.53 | -3.61 | -4.40 |
| propylacetate         | CCl <sub>4</sub> | -5.18 | -5.17 | -4.11 | -5.03 |
| methylpentanoate      | CCl <sub>4</sub> | -6.07 | -6.45 | -5.11 | -5.71 |
| butylacetate          | CCl <sub>4</sub> | -6.12 | -5.81 | -4.61 | -5.59 |
| methylhexanoate       | CCl <sub>4</sub> | -7.02 | -6.46 | -5.12 | -6.36 |



|                         |                  |        |       |       |       |
|-------------------------|------------------|--------|-------|-------|-------|
| pentylacetate           | CCl <sub>4</sub> | -7.06  | -6.45 | -5.12 | -6.35 |
| ethylamine              | CCl <sub>4</sub> | -2.78  | -3.25 | -2.54 | -2.77 |
| dimethylamine           | CCl <sub>4</sub> | -2.78  | -3.27 | -2.55 | -2.75 |
| propylamine             | CCl <sub>4</sub> | -3.67  | -3.90 | -3.06 | -3.59 |
| trimethylamine          | CCl <sub>4</sub> | -3.75  | -3.89 | -3.05 | -3.09 |
| butylamine              | CCl <sub>4</sub> | -4.59  | -4.56 | -3.58 | -5.35 |
| diethylamine            | CCl <sub>4</sub> | -4.56  | -4.56 | -3.57 | -4.12 |
| pyridine                | CCl <sub>4</sub> | -4.62  | -4.16 | -3.38 | -5.01 |
| aniline                 | CCl <sub>4</sub> | -5.89  | -4.83 | -3.99 | -6.10 |
| N-methylaniline         | CCl <sub>4</sub> | -6.93  | -5.45 | -4.29 | -6.58 |
| benzotrile              | CCl <sub>4</sub> | -6.29  | -4.88 | -4.00 | -6.28 |
| 1-nitropropane          | CCl <sub>4</sub> | -4.06  | -3.98 | -3.23 | -4.49 |
| nitrobenzene            | CCl <sub>4</sub> | -6.32  | -4.89 | -4.06 | -6.92 |
| 2-methyl-1-nitrobenzene | CCl <sub>4</sub> | -7.31  | -5.46 | -4.27 | -7.39 |
| thioanisole             | CCl <sub>4</sub> | -7.83  | -5.97 | -4.63 | -5.66 |
| p-hydroxybenzaldehyde   | CCl <sub>4</sub> | -6.82  | -5.33 | -4.55 | -8.16 |
| fluorobenzene           | CCl <sub>4</sub> | -5.01  | -4.53 | -3.71 | -3.64 |
| chlorobenzene           | CCl <sub>4</sub> | -6.15  | -5.11 | -4.05 | -5.21 |
| 1,4-dichlorobenzene     | CCl <sub>4</sub> | -7.38  | -5.95 | -4.59 | -6.28 |
| bromobenzene            | CCl <sub>4</sub> | -6.68  | -5.40 | -4.23 | -5.85 |
| p-bromophenol           | CCl <sub>4</sub> | -7.11  | -5.78 | -4.64 | -7.86 |
| ammonia                 | CCl <sub>4</sub> | -0.94  | -1.67 | -1.35 | -1.06 |
| water                   | CCl <sub>4</sub> | -0.61  | -1.44 | -1.32 | -0.85 |
| trimethylphosphate      | CCl <sub>4</sub> | -5.36  | -5.80 | -4.62 | -7.24 |
| triethylphosphate       | CCl <sub>4</sub> | -8.16  | -7.25 | -5.75 | -7.51 |
| tripropylphosphate      | CCl <sub>4</sub> | -10.92 | -8.75 | -6.89 | -8.60 |
| methylamine             | CCl <sub>4</sub> | -1.82  | -2.52 | -1.97 | -2.53 |
| methylbenzoate          | CCl <sub>4</sub> | -7.50  | -6.06 | -4.83 | -7.19 |
| nitromethane            | CCl <sub>4</sub> | -2.28  | -3.02 | -2.55 | -3.52 |
| carbontetrachloride     | CCl <sub>4</sub> | -5.22  | -5.26 | -3.90 | -4.35 |
| benzamide               | CCl <sub>4</sub> | -6.86  | -5.42 | -4.36 | -9.13 |
| 2-methylaniline         | CCl <sub>4</sub> | -6.86  | -5.35 | -4.21 | -7.16 |
| 3-methylaniline         | CCl <sub>4</sub> | -6.92  | -5.40 | -4.25 | -7.23 |
| 4-methylaniline         | CCl <sub>4</sub> | -6.94  | -5.40 | -4.25 | -7.24 |
| hydrogenperoxide        | CCl <sub>4</sub> | -1.00  | -1.98 | -1.66 | -3.14 |
| iodobenzene             | CCl <sub>4</sub> | -7.72  | -6.10 | -4.77 | -6.50 |
| n-heptane               | heptane          | -5.75  | -6.71 | -5.06 | -4.65 |
| benzene                 | heptane          | -4.31  | -4.80 | -3.67 | -4.00 |
| toluene                 | heptane          | -5.19  | -5.52 | -4.19 | -4.78 |
| o-xylene                | heptane          | -6.01  | -6.16 | -4.69 | -5.52 |
| m-xylene                | heptane          | -6.07  | -6.21 | -4.70 | -5.57 |
| p-xylene                | heptane          | -6.09  | -6.22 | -4.71 | -5.52 |
| naphthalene             | heptane          | -7.53  | -6.71 | -5.12 | -7.02 |
| anthracene              | heptane          | -11.46 | -8.57 | -6.55 | -10.0 |
| methanol                | heptane          | -1.27  | -2.65 | -2.06 | -1.29 |
| ethanol                 | heptane          | -2.07  | -3.48 | -2.67 | -2.16 |
| 1-propanol              | heptane          | -2.84  | -4.24 | -3.25 | -3.01 |
| 1-butanol               | heptane          | -3.63  | -4.95 | -3.81 | -3.66 |
| 1-pentanol              | heptane          | -4.43  | -5.73 | -4.35 | -4.00 |
| phenol                  | heptane          | -4.66  | -5.21 | -4.03 | -5.32 |
| 1-hexanol               | heptane          | -5.23  | -6.42 | -4.90 | -4.89 |
| o-cresol                | heptane          | -5.51  | -5.91 | -4.55 | -6.01 |
| m-cresol                | heptane          | -5.53  | -5.94 | -4.58 | -5.01 |

|                          |         |        |       |       |       |
|--------------------------|---------|--------|-------|-------|-------|
| p-cresol                 | heptane | -5.53  | -5.95 | -4.59 | -5.77 |
| 1-heptanol               | heptane | -6.03  | -6.46 | -4.90 | -5.06 |
| anisole                  | heptane | -5.54  | -5.98 | -4.59 | -5.35 |
| benzaldehyde             | heptane | -5.40  | -5.64 | -4.39 | -5.50 |
| acetone                  | heptane | -2.63  | -3.90 | -3.05 | -2.61 |
| 2-butanone               | heptane | -3.38  | -4.64 | -3.58 | -3.36 |
| 2-pentanone              | heptane | -4.17  | -5.38 | -4.13 | -4.07 |
| 2-hexanone               | heptane | -4.97  | -6.08 | -4.68 | -4.55 |
| 3,3-dimethylbutanone     | heptane | -4.89  | -5.85 | -4.51 | -4.30 |
| 2-heptanone              | heptane | -5.78  | -6.84 | -5.22 | -5.22 |
| acetophenone             | heptane | -6.15  | -6.33 | -4.89 | -6.14 |
| propanoicacid            | heptane | -2.85  | -4.35 | -3.43 | -4.06 |
| butanoicacid             | heptane | -3.64  | -5.07 | -3.97 | -5.05 |
| pentanoicacid            | heptane | -4.44  | -5.82 | -4.53 | -5.23 |
| hexanoicacid             | heptane | -5.24  | -6.50 | -5.09 | -6.54 |
| methylacetate            | heptane | -2.87  | -4.40 | -3.44 | -2.97 |
| methylpropanoate         | heptane | -3.63  | -5.13 | -3.96 | -3.63 |
| ethylacetate             | heptane | -3.67  | -5.13 | -3.96 | -3.50 |
| propylacetate            | heptane | -4.46  | -2.23 | -4.50 | -4.09 |
| methylpentanoate         | heptane | -5.24  | -6.60 | -5.06 | -4.92 |
| butylacetate             | heptane | -5.27  | -6.59 | -5.05 | -4.83 |
| methylhexanoate          | heptane | -6.04  | -7.31 | -5.61 | -5.63 |
| pentylacetate            | heptane | -6.08  | -7.32 | 5.60  | -5.42 |
| ethylamine               | heptane | -2.39  | -3.67 | -2.76 | -2.09 |
| propylamine              | heptane | -3.16  | -4.40 | -3.33 | -3.03 |
| butylamine               | heptane | -3.95  | -5.14 | -3.89 | -3.55 |
| pyridine                 | heptane | -3.98  | -4.66 | -3.58 | -4.28 |
| aniline                  | heptane | -5.08  | -5.40 | -4.14 | -5.38 |
| acetonitrile             | heptane | -1.80  | -2.95 | -2.29 | -2.06 |
| benzonitrile             | heptane | -5.42  | -5.47 | -4.23 | -5.33 |
| nitrobenzene             | heptane | -5.44  | -5.88 | -4.72 | -6.14 |
| fluorobenzene            | heptane | -4.31  | -5.06 | -3.93 | -4.13 |
| chlorobenzene            | heptane | -5.30  | -5.70 | -4.29 | -5.10 |
| 1,2-dichlorobenzene      | heptane | -6.23  | -6.52 | -4.83 | -6.01 |
| 1,4-dichlorobenzene      | heptane | -6.35  | -6.65 | -4.89 | -5.81 |
| bromobenzene             | heptane | -5.75  | -6.02 | -4.44 | -5.72 |
| p-dibromobenzene         | heptane | -7.32  | -7.23 | -5.22 | -7.55 |
| trimethylphosphate       | heptane | -4.61  | -6.50 | -5.05 | -5.59 |
| triethylphosphate        | heptane | -7.02  | -8.24 | -6.29 | -6.67 |
| tripropylphosphate       | heptane | -9.40  | -9.97 | -7.55 | -7.50 |
| 2-octanone               | heptane | -6.59  | -7.52 | -5.77 | -5.68 |
| thiophene                | heptane | -4.02  | -4.45 | -3.67 | -4.09 |
| 2,2'-dichlorobiphenyl    | heptane | -10.63 | -9.09 | -6.80 | -9.22 |
| N,N-dimethylacetamide    | heptane | -4.00  | -5.19 | -4.01 | -4.80 |
| benzamide                | heptane | -5.91  | -6.10 | -4.76 | -7.26 |
| 2-methylaniline          | heptane | -5.91  | -6.02 | -4.57 | -6.28 |
| 3-methylaniline          | heptane | -5.95  | -6.09 | -4.62 | -6.35 |
| 4-methylaniline          | heptane | -5.97  | -6.09 | -4.62 | -6.15 |
| N-methyl-2-pyrrolidinone | heptane | -4.44  | -5.47 | -4.23 | -5.80 |
| 5-fluorouracil           | heptane | -4.32  | -6.61 | -4.56 | -11.3 |
| 6-fluorouracil           | heptane | -5.68  | -5.63 | -4.57 | -12.7 |
| iodobenzene              | heptane | -6.64  | -6.73 | -5.15 | -6.27 |
